# Supplementary material for: Bimetallic aluminum complexes with cyclic β-ketiminato ligands: the cooperative effect improves their capability in polymerization of lactide and ε-caprolactone
Source: Royal Society of Chemistry journal article supplement (doi:10.1039/c6py01092j), 2016-01-01
Supplement: c6py01092j1.pdf [file c6py01092j1.pdf]

## Supporting Information

### Bimetallic aluminum complexes with cyclic $\beta$ -ketiminato ligands: cooperative effect improves capability in polymerization of lactide and $\epsilon$ -caprolactone

Hai-Chao Huang,<sup>a</sup> Bin Wang,<sup>a</sup> Yan-Ping Zhang<sup>a</sup> and Yue-Sheng Li<sup>\*a,b</sup>

<sup>a</sup> Tianjin Key Lab Composite & Functional Materials, School of Materials Science and Engineering, Tianjin University, Tianjin 300072, China

<sup>b</sup> Collaborative Innovation Center of Chemical Science and Engineering (Tianjin), Tianjin 300072, China

\*Corresponding Author, E-mail: [ysli@tju.edu.cn](mailto:ysli@tju.edu.cn)

**Table S1.** Crystal data and structure refinements of complexes **4a-c**

|                                                  | 4a                                                                            | 4b                                                                            | 4c                                                                            |
|--------------------------------------------------|-------------------------------------------------------------------------------|-------------------------------------------------------------------------------|-------------------------------------------------------------------------------|
| Empirical formula                                | C <sub>28</sub> H <sub>34</sub> Al <sub>2</sub> N <sub>2</sub> O <sub>2</sub> | C <sub>32</sub> H <sub>40</sub> Al <sub>2</sub> N <sub>2</sub> O <sub>2</sub> | C <sub>31</sub> H <sub>40</sub> Al <sub>2</sub> N <sub>2</sub> O <sub>2</sub> |
| Formula weight                                   | 484.53                                                                        | 538.62                                                                        | 526.61                                                                        |
| Crystal system                                   | Monoclinic                                                                    | Monoclinic                                                                    | Triclinic                                                                     |
| Space group                                      | P2(1)/c                                                                       | P2(1)/c                                                                       | P-1                                                                           |
| Temperature(K)                                   | 113(2)                                                                        | 113(2)                                                                        | 113(2)                                                                        |
| Wavelength(A)                                    | 0.71073                                                                       | 0.71075                                                                       | 0.71073                                                                       |
| a(Å)                                             | 10.649(2)                                                                     | 10.1875(7)                                                                    | 7.4541(8)                                                                     |
| b(Å)                                             | 10.0527(18)                                                                   | 23.8487(16)                                                                   | 12.2711(13)                                                                   |
| c(Å)                                             | 12.321(2)                                                                     | 12.0803(8)                                                                    | 15.7103(15)                                                                   |
| $\alpha$ (°)                                     | 90.00                                                                         | 90.00                                                                         | 77.640(6)                                                                     |
| $\beta$ (°)                                      | 98.931(4)                                                                     | 96.1673(16)                                                                   | 81.252(6)                                                                     |
| $\gamma$ (°)                                     | 90.00                                                                         | 90.00                                                                         | 80.078(6)                                                                     |
| V(Å <sup>3</sup> ),Z                             | 1303.0(4), 2                                                                  | 2918.0(3), 4                                                                  | 1372.8(2), 2                                                                  |
| Densitycalcd(Mg/m <sup>3</sup> )                 | 1.235                                                                         | 1.226                                                                         | 1.274                                                                         |
| Absorptioncoefficient(mm <sup>-1</sup> )         | 0.139                                                                         | 0.131                                                                         | 0.137                                                                         |
| F(000)                                           | 516                                                                           | 1152                                                                          | 564                                                                           |
| Crystal size/mm                                  | 0.20 x 0.18 x 0.12                                                            | 0.100 x 0.080 x 0.080                                                         | 0.20 x 0.18 x 0.12                                                            |
| $\theta$ range for data (°)                      | 3.11 to 27.50                                                                 | 1.710 to 28.723                                                               | 3.06 to 27.55                                                                 |
| Reflections collected                            | 16257                                                                         | 39454                                                                         | 17806                                                                         |
| Independent reflections                          | 2981                                                                          | 7499                                                                          | 6207                                                                          |
|                                                  | R(int) = 0.0181                                                               | R(int) = 0.0213                                                               | R(int) = 0.0226                                                               |
| Data/restraints/parameters                       | 2981/0/156                                                                    | 7499/0/343                                                                    | 6207/0/334                                                                    |
| Goodness-of-fit on F <sup>2</sup>                | 1.048                                                                         | 1.045                                                                         | 1.038                                                                         |
| Final R indices [I>2 $\sigma$ (I)]: R1, wR2      | R1 = 0.0292<br>wR2 = 0.0852                                                   | R1 = 0.0334<br>wR2 = 0.0929                                                   | R1 = 0.0328<br>wR2 = 0.0937                                                   |
| Largest diff. Peak and hole (e Å <sup>-3</sup> ) | 0.365 and -0.235                                                              | 0.416 and -0.330                                                              | 0.385 and -0.365                                                              |

**Table S2** Selected bond distances (Å) and angles (°) for complexes **4a-c**

|                                       | <b>4a</b>  | <b>4b</b>  | <b>4c</b>  |
|---------------------------------------|------------|------------|------------|
| Bond distances                        |            |            |            |
| Al(1)-O(1)                            | 1.8004(9)  | 1.7990(9)  | 1.7988(9)  |
| Al(1)-N(1)                            | 1.9359(10) | 1.9448(10) | 1.9497(11) |
| Al(1)-C(13)                           | 1.9605(12) | 1.9539(13) | 1.9565(13) |
| Al(1)-C(14)                           | 1.9611(13) | 1.9609(12) | 1.9628(13) |
| O(1)-C(1)                             | 1.3119(13) | 1.3097(12) | 1.3151(14) |
| N(1)-C(11)                            | 1.3080(14) | 1.3171(14) | 1.3071(15) |
| N(1)-C(12)                            | 1.4696(13) | 1.4761(12) | 1.4785(14) |
| Bond angles                           |            |            |            |
| O(1)-Al(1)-N(1)                       | 94.48(4)   | 94.82(4)   | 93.91(4)   |
| O(1)-Al(1)-C(13)                      | 114.99(5)  | 110.16(5)  | 111.89(5)  |
| N(1)-Al(1)-C(13)                      | 108.88(5)  | 111.22(5)  | 109.77(5)  |
| O(1)-Al(1)-C(14)                      | 112.21(5)  | 108.36(5)  | 106.87(5)  |
| N(1)-Al(1)-C(14)                      | 110.42(5)  | 113.69(5)  | 112.49(5)  |
| C(13)-Al(1)-C(14)                     | 114.06(5)  | 116.39(6)  | 119.04(6)  |
| C(1)-O(1)-Al(1)                       | 129.43(7)  | 128.14(7)  | 121.21(7)  |
| C(11)-N(1)-Al(1)                      | 122.87(7)  | 120.13(7)  | 117.88(8)  |
| C(12)-N(1)-Al(1)                      | 120.56(7)  | 123.66(7)  | 123.91(8)  |
| The distances between Al(1) and Al(2) |            |            |            |
| Al(1)- Al(2)                          | 6.617      | 5.965      | 7.770      |

**Table S3** Ring-opening polymerization of *L*-LA and  $\epsilon$ -CL by **4a-c**/<sup>*i*</sup>PrOH system <sup>*a*</sup>

| Run | Complex   | Mono.                              | [Al]/[OH]/[M] | time (min) | Conv. (%) | TOF <sup><i>b</i></sup> (h <sup>-1</sup> ) | $M_{n,theo}^{c,d}$ ( $\times 10^4$ ) | $M_n^f$ ( $\times 10^4$ ) | $M_w/M_n^f$ |
|-----|-----------|------------------------------------|---------------|------------|-----------|--------------------------------------------|--------------------------------------|---------------------------|-------------|
| 1   | <b>4a</b> | $\epsilon$ -CL                     | 1:1:100       | 10         | 97        | 582                                        | 1.11                                 | 1.54                      | 1.17        |
| 2   | <b>4b</b> | $\epsilon$ -CL                     | 1:1:100       | 10         | 64        | 384                                        | 0.73                                 | 0.87                      | 1.14        |
| 3   | <b>M1</b> | $\epsilon$ -CL                     | 1:1:100       | 10         | 43        | 258                                        | 0.49                                 | 0.52                      | 1.14        |
| 4   | <b>4c</b> | $\epsilon$ -CL                     | 1:0:100       | 7          | --        | --                                         | --                                   | --                        | --          |
| 5   | <b>M2</b> | $\epsilon$ -CL                     | 1:1:100       | 7          | 84        | 720                                        | 0.96                                 | 1.00                      | 1.12        |
| 6   | <b>4c</b> | $\epsilon$ -CL                     | 1:1:100       | 3          | 83        | 1660                                       | 0.95                                 | 0.97                      | 1.19        |
| 7   | <b>4c</b> | $\epsilon$ -CL                     | 1:2:100       | 3          | 89        | 1780                                       | 0.51                                 | 0.53                      | 1.21        |
| 8   | <b>4c</b> | $\epsilon$ -CL                     | 1:4:100       | 3          | 85        | 1700                                       | 0.24                                 | 0.29                      | 1.27        |
| 9   | <b>4c</b> | $\epsilon$ -CL                     | 1:2:200       | 6          | 89        | 890                                        | 1.02                                 | 1.09                      | 1.21        |
| 10  | <b>4c</b> | $\epsilon$ -CL                     | 1:2:400       | 12         | 91        | 455                                        | 2.08                                 | 2.36                      | 1.24        |
| 11  | <b>4c</b> | $\epsilon$ -CL                     | 1:2:600       | 15         | 93        | 372                                        | 3.19                                 | 3.32                      | 1.22        |
| 12  | <b>4c</b> | $\epsilon$ -CL                     | 1:2:800       | 20         | 90        | 270                                        | 4.11                                 | 4.46                      | 1.25        |
| 13  | <b>4c</b> | $\epsilon$ -CL                     | 1:2:1000      | 30         | 94        | 188                                        | 5.36                                 | 5.53                      | 1.23        |
| 14  | <b>M2</b> | $\epsilon$ -CL                     | 1:2:200       | 6          | 69        | 73                                         | 0.79                                 | 0.89                      | 1.21        |
| 15  | <b>M2</b> | $\epsilon$ -CL                     | 1:2:400       | 12         | 71        | 355                                        | 1.62                                 | 2.01                      | 1.22        |
| 16  | <b>M2</b> | $\epsilon$ -CL                     | 1:2:600       | 16         | 74        | 296                                        | 2.54                                 | 2.95                      | 1.26        |
| 17  | <b>M2</b> | $\epsilon$ -CL                     | 1:2:800       | 20         | 65        | 195                                        | 2.97                                 | 3.39                      | 1.24        |
| 18  | <b>M2</b> | $\epsilon$ -CL                     | 1:2:1000      | 30         | 63        | 126                                        | 3.59                                 | 3.86                      | 1.25        |
| 19  | <b>4a</b> | <i>L</i> -LA                       | 1:1:100       | 240        | 36        | 9                                          | 0.52                                 | 0.58                      | 1.08        |
| 20  | <b>4b</b> | <i>L</i> -LA                       | 1:1:100       | 240        | trace     | --                                         | --                                   | --                        | --          |
| 21  | <b>4c</b> | <i>L</i> -LA                       | 1:1:100       | 10         | 20        | 120                                        | 0.29                                 | 0.27                      | 1.08        |
| 22  | <b>4c</b> | <i>L</i> -LA                       | 1:1:100       | 15         | 42        | 168                                        | 0.60                                 | 0.72                      | 1.07        |
| 23  | <b>4c</b> | <i>L</i> -LA                       | 1:1:100       | 30         | 74        | 148                                        | 1.07                                 | 1.34                      | 1.12        |
| 24  | <b>4c</b> | <i>L</i> -LA                       | 1:1:100       | 45         | 89        | 119                                        | 1.28                                 | 1.70                      | 1.14        |
| 25  | <b>4c</b> | <i>L</i> -LA                       | 1:1:100       | 60         | 97        | 97                                         | 1.40                                 | 1.89                      | 1.22        |
| 26  | <b>4c</b> | <i>rac</i> -LA <sup><i>g</i></sup> | 1:1:100       | 60         | 95        | 95                                         | 1.37                                 | 1.64                      | 1.23        |
| 27  | <b>M2</b> | <i>L</i> -LA                       | 1:0:100       | 90         | --        | --                                         | --                                   | --                        | --          |
| 28  | <b>M2</b> | <i>L</i> -LA                       | 1:1:100       | 90         | 79        | 53                                         | 1.14                                 | 1.02                      | 1.18        |

<sup>*a*</sup> 25  $\mu$ mol of Al complex in 2 mL toluene, and polymerization at 80 °C; <sup>*b*</sup> Non-optimized turnover frequency calculated over the whole reaction time; <sup>*c*</sup> Calculated  $M_{n,theo}=[\epsilon\text{-CL}]_0/[\text{OH}]\times\text{conv.}(\epsilon\text{-CL})\times 114.14+M_{i\text{PrOH}}$ ; <sup>*d*</sup> Calculated  $M_{n,theo}=[L\text{-LA}]_0/[\text{OH}]\times\text{conv.}(L\text{-LA})\times 144.13+M_{i\text{PrOH}}$ ; <sup>*f*</sup> Experimental  $M_n$  values were determined by GPC analysis in THF using polystyrene standards and corrected by the equation:  $M_n=0.58\times M_{n(\text{GPC})}$  for PLA, and  $M_n=0.56\times M_{n(\text{GPC})}$  for PCL. <sup>*g*</sup>  $P_m=0.33$ .

**Table S4** Synthesis of PLA-*b*-PCL copolymer by **4c**/<sup>i</sup>PrOH system <sup>a</sup>

| Entry                           | Complex | Time <sup>b</sup> | $M_{n, GPC}^c(10^{-4})$ | $M_n^d(10^{-4})$ | $M_w/M_n$ |
|---------------------------------|---------|-------------------|-------------------------|------------------|-----------|
| PLA- <i>b</i> -PCL <sup>e</sup> | 4c      | 1.5h(LA)+1h(CL)   | 4.0                     | 2.12             | 1.34      |

<sup>a</sup> Reaction conditions: 25  $\mu$ mol complex in toluene, <sup>i</sup>PrOH 1.0 equiv. to Al, monomer 5.0 mmol, 80 °C; <sup>b</sup> After LA reaction for 1.5 h, CL was added and reacted for the prescribed time; <sup>c</sup> GPC data determined by SEC in THF relative to polystyrene standards; <sup>d</sup> GPC data determined by SEC in THF relative to polystyrene standards corrected by the Mark–Houwink correction factor ( $M_n = M_{n, SEC} \times 0.56 \times \text{PCL}\% + M_{n, SEC} \times 0.58 \times \text{PLLA}\%$ ); <sup>e</sup> the first block PLA with  $M_{n, GPC} = 1.83 \times 10^4$ ,  $M_w/M_n = 1.21$ , conversion > 99%

**Table S5.** Experimental  $T_g$  of the CL/LA copolymers as a function of the mole fraction of  $\epsilon$ -CL unit

| Entry | Time<br>(h) | CL in copolymer <sup>b</sup><br>(%) | $T_g$<br>(°C) |
|-------|-------------|-------------------------------------|---------------|
| 1     | 0.5         | 14.5                                | 43            |
| 2     | 1           | 21.8                                | 35            |
| 3     | 2           | 45.1                                | 2.4           |
| 4     | 3           | 50.0                                | -2.6          |

<sup>a</sup> Reaction conditions: 25  $\mu$ mol of Al catalyst in 2 mL of toluene, <sup>i</sup>PrOH/[Al] = 2.0, [CL]/[LA]/[Al]=100:100:1, copolymerization at 80 °C; <sup>b</sup> CL in copolymer measured by <sup>1</sup>H NMR.

**Table S6.** Calculate reactivity ratios for *L*-LA and  $\epsilon$ -CL in Poly(LA-*grad*-CL) copolymers <sup>a</sup>

| Entry | Conv. (%) | $X^b$ | $Y^c$ | $G^d$ | $F^e$ |
|-------|-----------|-------|-------|-------|-------|
| 1     | 3.1       | 0.43  | 3.15  | 0.29  | 0.059 |
| 2     | 5.4       | 1.0   | 6.67  | 2.11  | 0.58  |
| 3     | 5.4       | 2.3   | 14.3  | 4.71  | 1.39  |
| 4     | 4.7       | 9.0   | 33.3  | 8.73  | 2.43  |

<sup>a</sup> Reaction conditions: 25  $\mu$ mol of Al catalyst in 2 ml of toluene, [<sup>i</sup>PrOH]/[Al] = 2.0, 80 °C; The reactivity ratios were calculated using the nonlinear least squares (NLLS) method, the monomer composition in the obtained oligomer was examined at a low conversion ( $\leq 10\%$ ).

<sup>b</sup>  $X = M_{LA}/M_{CL}$ ,  $M_{LA}$  and  $M_{CL}$  were defined as moles of monomer in the copolymerization reaction system;

<sup>c</sup>  $Y$  was defined as the mole ratio of two kinds of monomer;

<sup>d</sup>  $G = X(Y-1)/Y$ ;

<sup>e</sup>  $F = X^2/Y^3$ .

**Table S7.** Copolymerization of  $\epsilon$ -CL and *L*-LA with different monomer ratio by **4a**/<sup>i</sup>PrOH system <sup>a</sup>

| Run | LA:CL :Al:OH<br>(mol:mol) | Conversion<br>(%) | $M_n^b$<br>/10 <sup>-4</sup> | $M_w/M_n^b$ | $L_{CL}^c$ | $L_{LA}^c$ | CL (mol<br>%) <sup>d</sup> |
|-----|---------------------------|-------------------|------------------------------|-------------|------------|------------|----------------------------|
| 1   | 400:100:1:1               | trace             | --                           | --          | --         | --         | --                         |
| 2   | 200:100:1:1               | 29                | 0.84                         | 1.31        | 5.25       | 27.6       | 24.7                       |
| 3   | 100:100:1:1               | 41                | 1.12                         | 1.39        | 3.36       | 20.8       | 21.2                       |
| 4   | 100:200:1:1               | 46                | 1.38                         | 1.37        | 4.61       | 29.1       | 17.8                       |
| 5   | 100:400:1:1               | 19                | 0.69                         | 1.41        | --         | --         | --                         |

<sup>a</sup> Reaction conditions: 25  $\mu$ mol of Al catalyst and copolymerization at 80 °C for 8 h; <sup>b</sup> Determined by GPC in THF using polystyrene as standard; <sup>c</sup> Average sequences length of the caproyl unit and lactidyl unit was determined by <sup>13</sup>C NMR; <sup>d</sup> Monomer conversion was determined by <sup>1</sup>H NMR. <sup>d</sup> CL in the copolymer (mol %)

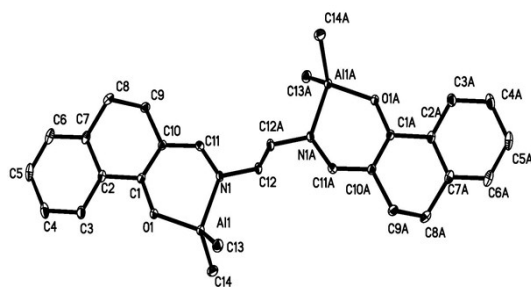

**Fig. S1.** Molecular structure of complex **4a** with thermal ellipsoids at the 30% probability level. Hydrogen atoms are omitted for clarity.

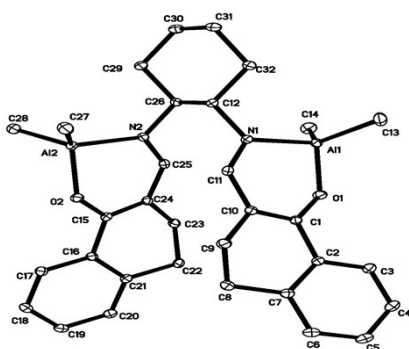

**Fig. S2.** Molecular structure of complex **4b** with thermal ellipsoids at the 30% probability level. Hydrogen atoms are omitted for clarity.

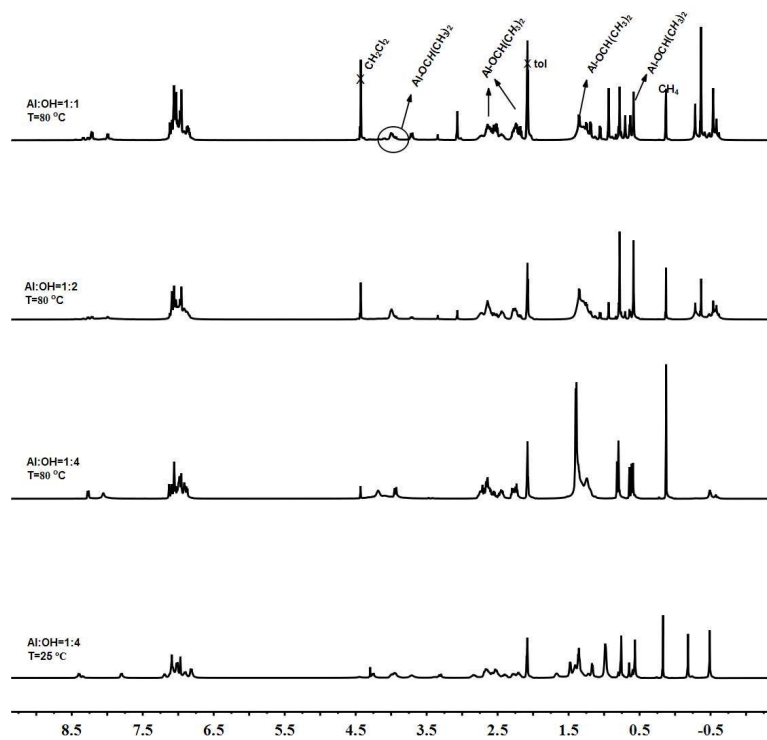

**Fig. S3.**  $^1\text{H}$  NMR spectrum of binuclear aluminum complexes **4c** in the presence of  $i\text{PrOH}$  (toluene- $d_8$ , 400 MHz)

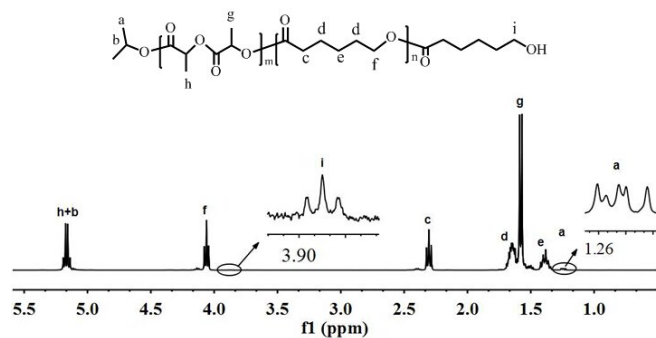

**Fig. S4.** Methyne proton of the hydroxyl end group of the PLA-*b*-PCL copolymer (CDCl<sub>3</sub>, 25 °C).

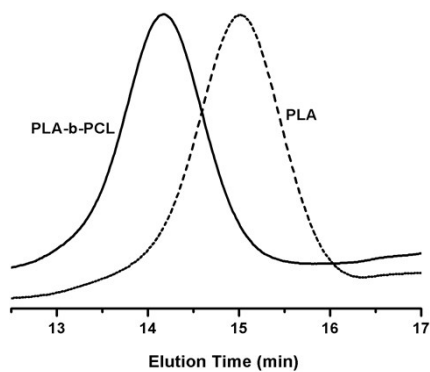

**Fig.S5.** GPC profiles of PLA and PLA-*b*-PCL obtained by the **4c**/<sup>i</sup>PrOH system (in THF at 25 °C).

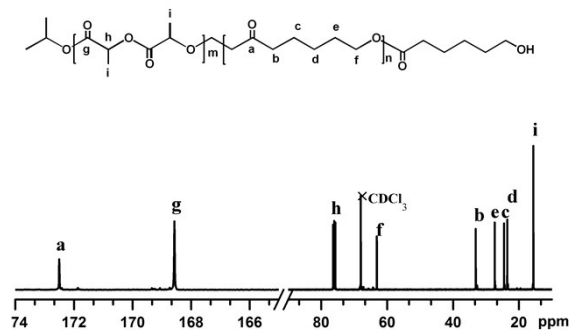

**Fig. S6.** <sup>13</sup>C NMR spectrum of PLA-*b*-PCL synthesized by **4c**/<sup>i</sup>PrOH system (CDCl<sub>3</sub>, 25 °C).

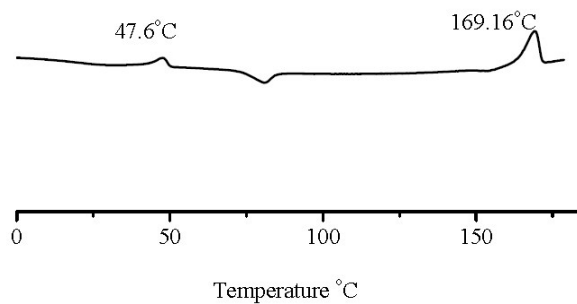

**Fig. S7.** DSC curve of PLA-*b*-PCL prepared by **4c**/<sup>i</sup>PrOH system.

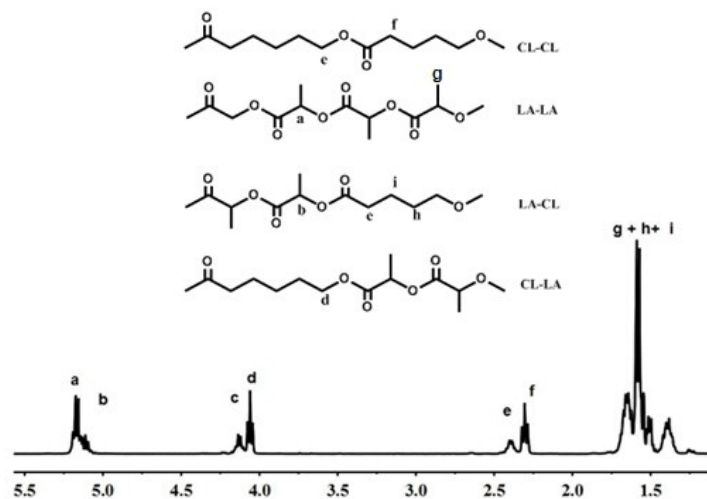

**Fig. S8.**  $^1\text{H}$  NMR spectrum of poly(LA-grad-CL) copolymer (run 2, Table 3) (CDCl<sub>3</sub>, 25 °C).

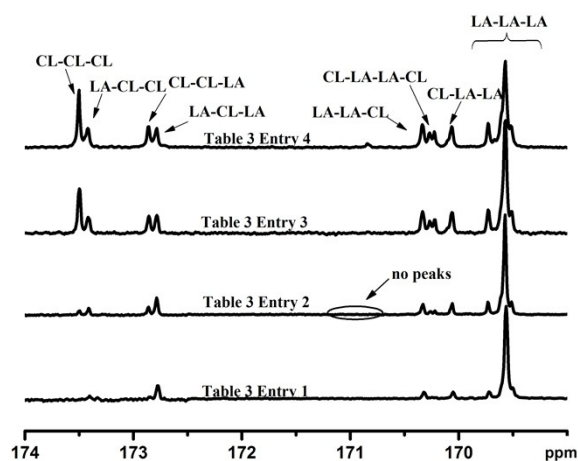

**Fig. S9.**  $^{13}\text{C}$  NMR spectra (CDCl<sub>3</sub>, 25 °C) of the copolymers obtained at different conversion.

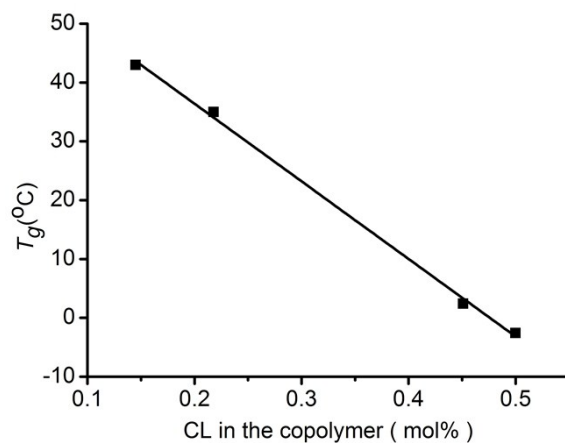

**Fig. S10.** Experimental  $T_g$  of the CL/LA copolymers as a function of the mole fraction of  $\epsilon$ -CL unit.



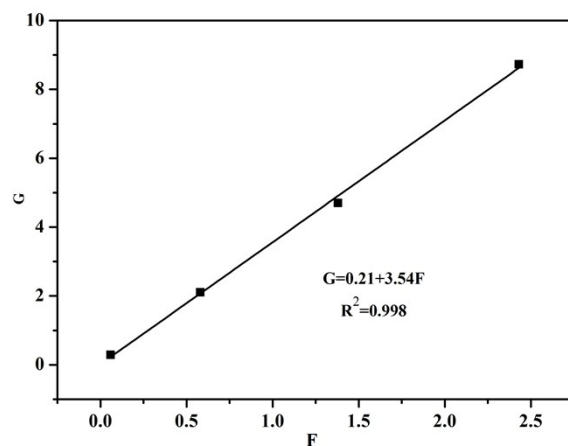

**Fig. S11.** G-F plot for Poly(LA-grad-CL) copolymers by **4c**/*i*PrOH system.

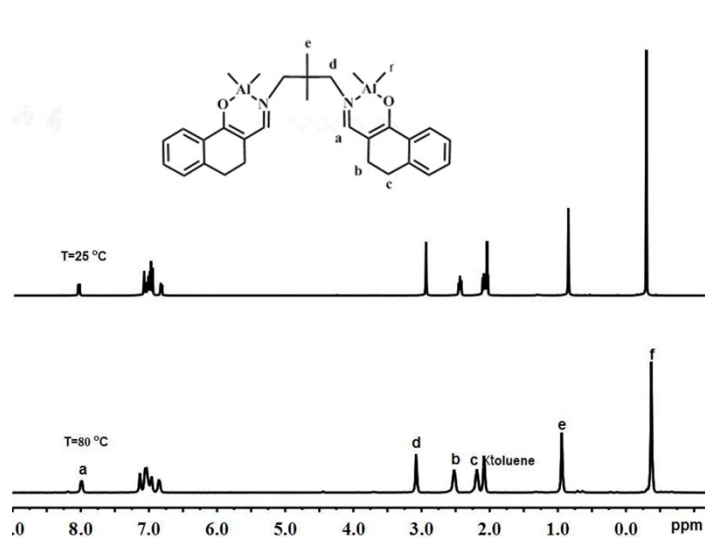

**Fig. S12.**  $^1\text{H}$  NMR spectrum of binuclear aluminum complexes **4c** (toluene- $d_8$ , 400 MHz)

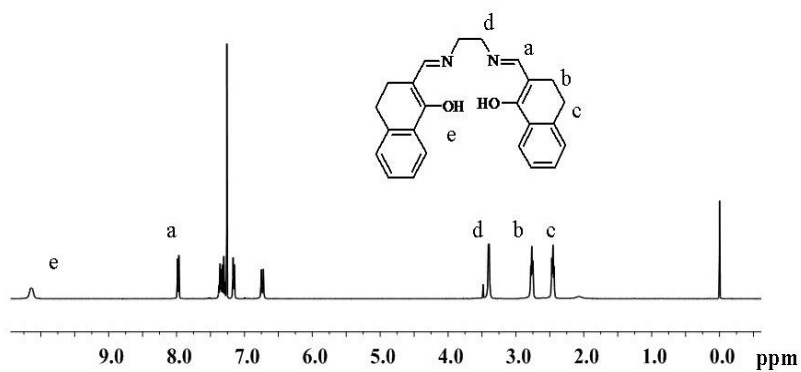

**Fig. S13.**  $^1\text{H}$  NMR spectrum of  $\beta$ -ketiminato ligand **3a** ( $\text{CDCl}_3$ , 25 °C).

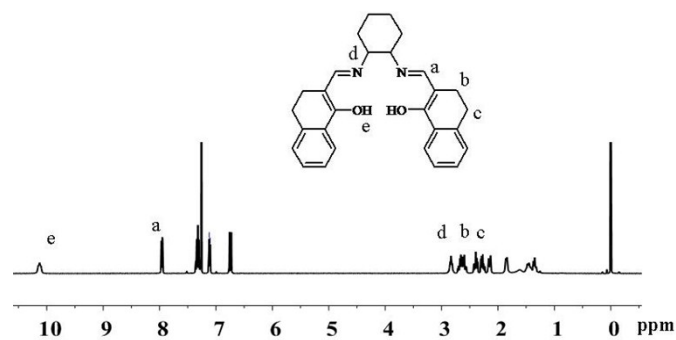

**Fig. S14.**  $^1\text{H}$  NMR spectrum of  $\beta$ -ketiminato ligand **3b** ( $\text{CDCl}_3$ , 25  $^\circ\text{C}$ ).

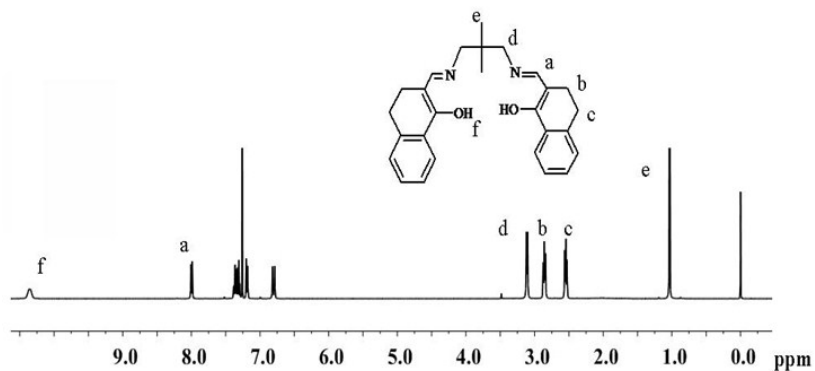

**Fig. S15.**  $^1\text{H}$  NMR spectrum of  $\beta$ -ketiminato ligand **3c** ( $\text{CDCl}_3$ , 25  $^\circ\text{C}$ ).

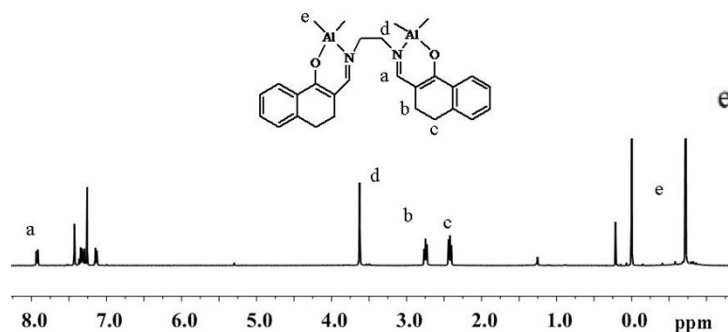

**Fig. S16.**  $^1\text{H}$  NMR spectrum of binuclear aluminum complexes **4a** ( $\text{CDCl}_3$ , 25  $^\circ\text{C}$ ).

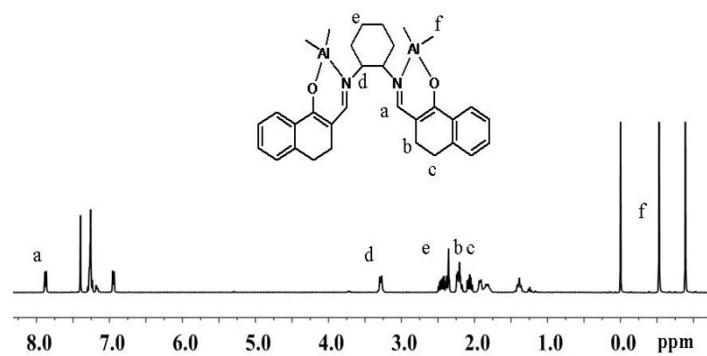

**Fig. S17.**  $^1\text{H}$  NMR spectrum of binuclear aluminum complexes **4b** ( $\text{CDCl}_3$ , 25  $^\circ\text{C}$ ).

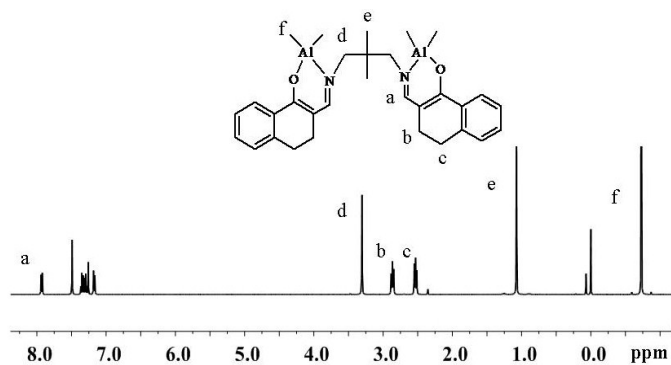

**Fig. S18.**  $^1\text{H}$  NMR spectrum of binuclear aluminum complexes **4c** ( $\text{CDCl}_3$ ,  $25^\circ\text{C}$ ).

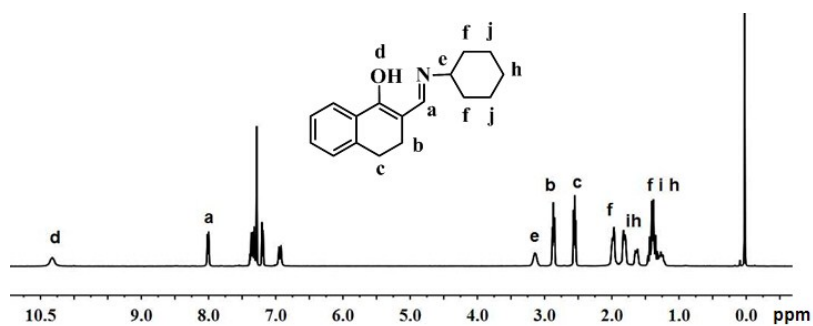

**Fig. S19.**  $^1\text{H}$  NMR spectrum of  $\beta$ -ketimino ligand for **M1** ( $\text{CDCl}_3$ ,  $25^\circ\text{C}$ ).

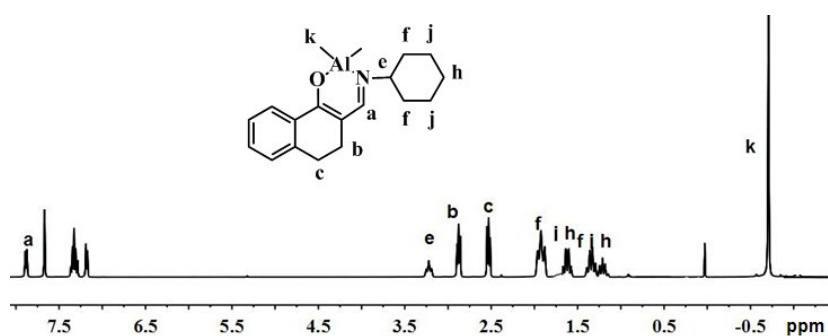

**Fig. S20.**  $^1\text{H}$  NMR spectrum of mononuclear aluminum complex **M1** ( $\text{CDCl}_3$ ,  $25^\circ\text{C}$ ).

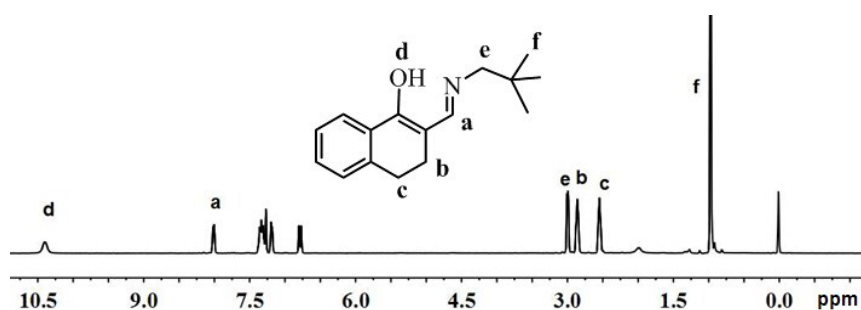

**Fig. S21.**  $^1\text{H}$  NMR spectrum of mononuclear aluminum complex for **M2** ( $\text{CDCl}_3$ ,  $25^\circ\text{C}$ ).

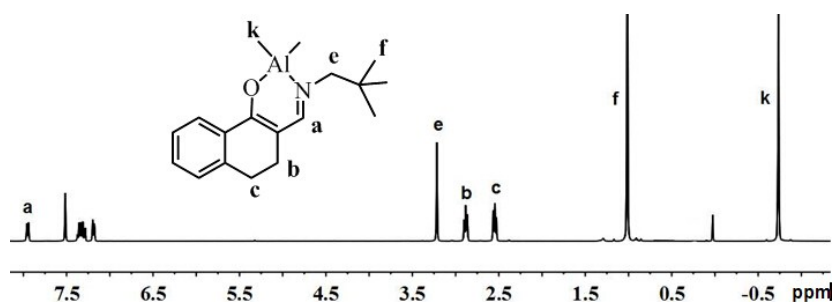

**Fig. S22.**  $^1\text{H}$  NMR spectrum of mononuclear aluminum complex **M2** ( $\text{CDCl}_3$ ,  $25^\circ\text{C}$ ).

### Synthesis of aluminum complexes **M1** and **M2**

Into a stirred solution of  $\text{C}_6\text{H}_{11}\text{N}=\text{CHC}_4\text{H}_4(\text{C}_6\text{H}_4)\text{OH}$  (2.0 mmol) in toluene (10 mL),  $\text{AlMe}_3$  (1 M hexane solution, 2.1 mL) was added drop-wise over 10 min. After stirred for 8 h the solution was concentrated and cooled to  $-20^\circ\text{C}$ , yellow solid was isolated by filter and recrystallized from mixture of toluene/hexane and afforded  $[\text{C}_6\text{H}_{11}\text{N}=\text{CHC}_4\text{H}_4(\text{C}_6\text{H}_4)\text{O}] \text{Al}(\text{CH}_3)_2$  (**M1**) Yield:92%.  $^1\text{H}$  NMR (400 MHz,  $\text{CDCl}_3$ ) 7.88 (d, 1H, N = C-H), 7.67 (s, 1H, Ar-H), 7.33 (m, 2H, Ar-H), 7.18 (d, 1H, Ar-H), 3.22 (dd, 1H, CH-( $\text{CH}_2$ )<sub>2</sub>), 2.95–2.77 (m, 2H, - $\text{CH}_2$ -), 2.62–2.47 (m, 2H, - $\text{CH}_2$ -), 1.92 (t, 4H, -CH- $\text{CH}_2$ ), 1.80–1.02 (m, 6H), -0.71 (s, Al- $\text{CH}_3$ , 6H).  $^{13}\text{C}$  NMR (100 MHz,  $\text{CDCl}_3$ ):166.33, 139.73, 133.29, 130.76, 127.15, 126.69, 125.93, 104.37, 67.35, 31.08, 28.69, 25.94, 25.56, 25.15, 24.5, -8.45.

Synthesis for  $[\text{C}(\text{CH}_3)_3\text{CHN}=\text{CHC}_4\text{H}_4(\text{C}_6\text{H}_4)\text{O}] \text{Al}(\text{CH}_3)_2$  (**M2**) was performed according to the same procedure as that of **M1** Yield:88%.  $^1\text{H}$  NMR (400 MHz,  $\text{CDCl}_3$ ) 7.95 (d, 1H, N = C-H), 7.51 (s, 1H, Ar-H), 7.42–7.25 (m, 2H, Ar-H), 7.19 (d, 1H, Ar-H), 3.22 (s, 2H - $\text{CH}_2$ -CH), 2.95–2.78 (m, 2H, - $\text{CH}_2$ -), 2.66–2.46 (m, 2H, - $\text{CH}_2$ -), 1.01 (s, 9H,  $\text{CH}_3$ ), -0.73 (d, 6H, Al- $\text{CH}_3$ ).  $^{13}\text{C}$  NMR (100 MHz,  $\text{CDCl}_3$ ):166.46, 139.45, 133.18, 130.87, 127.26, 126.75, 125.97, 106.16, 67.57, 33.97, 28.51, 25.84, 25.39, 25.17, -8.65.
